# Supplementary material
Source: publisher site journal article supplement (https://www.spandidos-publications.com/7630/downloadSupplementary)
Supplement: Supplementary file 1 [file downloadSupplementary]

**Table S1.** Primer and oligonucleotide sequences.

| Sequence type    | Sense (5'-3')                               | Antisense (5'-3')                                      |
|------------------|---------------------------------------------|--------------------------------------------------------|
| Primers          |                                             |                                                        |
| KIAA1429         | TCAGACTGTGAGGGTTGT                          | CAGGGTGAGCACTTGTTA                                     |
| ZFPM2-AS1        | TGCCTTCCTTCCCTTAT                           | GACGCTCAGTCGTTACATC                                    |
| GAPDH            | GCACCGTCAAGGCTGAGAAC                        | GGATCTCGCTCCTGGAAGATG                                  |
| Oligonucleotides |                                             |                                                        |
| shNC             | GATTCTGGATTAGTGCCTAGCTT                     | AAGCTAGACGCACTAATCCAGAATC                              |
| shKIAA1429-1     | CGCTGAGCAAAGTTCTCATAT                       | ATATGAGAACTTTGCTCAGCG                                  |
| shKIAA1429-2     | CCCAACGATGGCACGAATTAC                       | GTAATTCGTGCCATCGTTGGG                                  |
| siNC             | CAUGUACGUGUUUAGGGUCGAC AUU                  | AAUGUCGACCCUAAACACGUACAUG                              |
| siZFPM2-AS1      | GCAGAGTTGCACAGAAGAA                         | TTGGGCAATTAATTAAGCCA                                   |
| oeKIAA1429       | TAAGCTTGGTACCGAGCTCGATGGCGGTGGACTCG<br>GCGA | CCCTCTAGACTCGAGCGGCCTTATCGTGTAAGGA<br>GCGTACATGACGACCT |

ZFPM2-AS1, friend of GATA family member 2-antisense 1; shNC, negative control shRNA; shKIAA1429, shRNA targeting KIAA1429; siNC, negative control siRNA; siZFPM2-AS1, siRNA targeting ZFPM2-AS1; oeKIAA1429, KIAA1429 overexpression; shRNA, short hairpin RNA; siRNA, small interfering RNA.

**Table SII.** Top 20 genes positively correlated with KIAA1429 in The Cancer Genome Atlas-TARGET-osteosarcoma dataset.

| Rank | Gene name | Correlation coefficient | Adjusted_P-value       | Gene type       |
|------|-----------|-------------------------|------------------------|-----------------|
| 1    | DPY19L4   | 0.78                    | $1.36 \times 10^{-14}$ | Protein coding  |
| 2    | NBN       | 0.72                    | $3.45 \times 10^{-10}$ | Protein coding  |
| 3    | CPNE3     | 0.7                     | $4.32 \times 10^{-9}$  | Protein coding  |
| 4    | SNX16     | 0.68                    | $2.23 \times 10^{-8}$  | Protein coding  |
| 5    | UBR5      | 0.66                    | $1.64 \times 10^{-7}$  | Protein coding  |
| 6    | TRIQQ     | 0.66                    | $2.67 \times 10^{-7}$  | Protein coding  |
| 7    | TGS1      | 0.65                    | $8.60 \times 10^{-7}$  | Protein coding  |
| 8    | VPS13B    | 0.64                    | $1.26 \times 10^{-6}$  | Protein coding  |
| 9    | ARMC1     | 0.64                    | $1.28 \times 10^{-6}$  | Protein coding  |
| 10   | YTHDF3    | 0.64                    | $1.32 \times 10^{-6}$  | Protein coding  |
| 11   | RMDN1     | 0.64                    | $1.69 \times 10^{-6}$  | Protein coding  |
| 12   | STK3      | 0.63                    | $2.24 \times 10^{-6}$  | Protein coding  |
| 13   | NUDCD1    | 0.63                    | $2.38 \times 10^{-6}$  | Protein coding  |
| 14   | ZC2HC1A   | 0.63                    | $4.50 \times 10^{-6}$  | Protein coding  |
| 15   | RAD54B    | 0.62                    | $5.87 \times 10^{-6}$  | Protein coding  |
| 16   | RBM12B    | 0.62                    | $7.49 \times 10^{-6}$  | Protein coding  |
| 17   | ZFPM2-AS1 | 0.62                    | $8.95 \times 10^{-6}$  | Long non-coding |
| 18   | ANKRD46   | 0.62                    | $1.28 \times 10^{-5}$  | Protein coding  |
| 19   | PDP1      | 0.61                    | $1.73 \times 10^{-5}$  | Protein coding  |
| 20   | ZFAND1    | 0.61                    | $2.54 \times 10^{-5}$  | Protein coding  |
